# Supplementary material
Source: publisher figshare collection journal article supplement (https://karger.figshare.com/ndownloader/files/23726183)
Supplement: Supplementary file 1 [file 23726183]

| **Supplement Table 1** Reference laboratory values according to USZ lab standard values | |
| --- | --- |
| Haematocrit (%) | Male: 40-50  Female: 35-46 |
| Haemoglobin (g/dL) | Male: 13.4–17  Female: 11.7-15.3 |
| White blood cell count (×109/L) | 3.0–9.6 |
| Neutrophil cell count (×109/L) | 1.4-8.0 |
| Lymphocyte count (×109/L) | 1.50-4.00 |
| Platelet count (×109/L) | 143–400 |
| CRP (mg/dL) | <0.5 |
| Creatinine level (µmol/L) | Male: 62 - 106  Female: 44 - 80 |
| Blood urea level (mmol/L) | 18-59 years of age: 2.14 – 7.14  60-90 years of age: 2.86 – 8.21  >90 years of age: 3.57 – 11.07 |
| Blood glucose level (mmol/L) | 3.9 – 5.6 |
| LDH (U/L) | 240 - 480 |
| Sodium (mmol/L) | <90 years of age: 136 – 145  ≥90 years of age: 132 - 146 |
| Serum total protein (g/L) | 66 - 87 |
| Albumin (g/L) | 40 - 49 |
| AST(U/L) | Male: <50  Female: <35 |
| ALT (U/L) | Male: <50 |
|  | Female: <35 |
